# Supplementary material for: Natural stable isotope ratios and fatty acid profiles of estuarine tidal flat nematodes reveal very limited niche overlap among co-occurring species
Source: PeerJ. 2019 Oct 11;7:e7864. doi: 10.7717/peerj.7864 (PMC6791341; doi:10.7717/peerj.7864)
Supplement: Data S1 [file peerj-07-7864-s001.xlsx]

## Sheet: fatty acid relative concentrati
GenusStation	20:3w3	20:3w6	ara	C14:0	C15:0	C15:1w5	C16:0	C16:1w7	C16:2w6	C16:3w3	C17:0	C17:1w7	C18:0	C18:1w7	C18:1w9	C18:2w6cis	C18:2w6tr	C18:3	C18:4w3	C20:0	C20:1	C20:1w9	C20:2	C21:0	C22:0	C22:1w9	C22:5w3	C24:0	C24:1w9	DHA	EPA
Metachromadora 2	0	0	0	0.725063	1.28059	0.17855	6.48349	9.73456	0.477951	0.937756	0.351762	1.87721	3.08001	4.31722	0	0.373862	0.240532	0	0.435212	0.464058	0.284214	1.11431	0	0.335276	0.298391	1.05229	0.471518	0	0	3.60713	13.3825
Praeacanthonchus2	0	0	0	0.0883876	0.51661	0	2.25168	1.60903	0.163325	0.556925	0.467393	8.23872	2.61706	2.86206	0	0.35266	0	0	0	0.990118	0	1.23936	0	0.383327	0.762061	0.850402	1.65906	0	0.473143	8.57872	20.8395
Metachromadora 2	0	0	0	0.788096	1.25343	0.16037	6.22625	9.51399	0.401182	0.941905	0.325292	0	2.83028	3.96375	0	0.35065	0.24443	0	0.580673	0.427524	0.262377	0.997336	0	0.324333	0.271184	0.980249	0.428313	0	0	3.27401	12.0166
Praeacanthonchus2	0	0	0	1.68176	2.48544	0.307445	11.9223	19.1254	0.625081	2.38371	0.881442	0	5.22597	8.05861	0	0.673828	1.03897	0	0.924127	0.876641	0.737747	1.92278	0	0.725679	0.58444	2.80899	1.42397	0	0	6.06046	20.6784
Metachromadora 2	0	0	0	1.21078	1.54738	0.238376	8.56014	13.8722	0.637236	1.2005	0.371449	1.13106	3.32891	4.82911	0	0.397541	0.323861	0	0.539203	0.502195	0.330792	1.19648	0	0.349778	0.301422	1.14619	0.493945	0	0	4.04289	15.782
Praeacanthonchus2	0	0	0	4.05091	10.2586	1.39666	22.0385	18.4297	1.93028	4.48285	2.71346	0	9.40942	11.4645	0	0	0.793418	0.445187	1.48246	2.41923	0.852366	0.00339731	0	0	2.39584	2.3303	2.90059	0.608525	0.905065	15.1577	48.0481
Metachromadora 2	0	0.379042	2.42337	1.2848	0	2.54757	11.8983	18.1616	0	0	0.790699	3.68779	55303448	8.06768	1.48021	0	0.872401	0	0	0.872375	0.517742	2.07347	0	0.656048	0.581483	0.710589	1.42527	0	0	7.13016	23.5852
Praeacanthonchus2	0.49274	0.491233	3.09478	3.21997	0	9.16531	19.6287	16.4634	2.75189	2.81515	2.74736	9.15259	57200403	11.0007	3.13289	1.48277	0.80095	0.575161	0	2.76573	0.848181	3.56542	0	1.0069	3.26836	1.76727	6.8933	0.0918762	1.38265	23.512	53.7783
Metachromadora 1	0	0	0	1.30634	3.39109	0.446901	8.45496	7.37736	0.819012	1.80743	0.989226	1.75544	3.87878	4.78762	0	0.575743	0.330615	0.259589	0.564453	1.11638	0.312798	1.47703	0	0.358012	1.20567	1.17288	1.70634	0.275009	0.538125	8.63444	23.699
Metachromadora 1	0	0	0	0.596199	0.764158	0	4.93896	7.41337	0.230557	1.01339	0.328418	1.71973	2.4175	3.58646	0	0.247297	0.409703	0	0.423352	0.422195	0.273403	0.827915	0	0.345125	0.228147	1.20093	0.564676	0	0	2.77319	9.75311
Theristus1	0.199288	0.138557	1.27172	0.235582	0	0.145821	2.2747	1.5355	0	0	0.312458	0	13602264	1.91064	1.22252	0	0.129328	0	0	0.170862	0.578729	0.706877	0	0	0	1.94089	1.88288	0	0	8.99703	8.85608
Metachromadora 1	0	0	0	0.947434	1.33626	0.159225	6.88326	10.8431	0.343578	1.45477	0.433523	1.55337	2.77563	4.26665	0	0.269133	0.6979	0	0.50801	0.450489	0.317004	0.956763	0	0.380603	0.272181	1.36733	0.55381	0	0	3.0689	11.2791
Theristus1	0.236147	0.162589	1.42113	0.393681	0	0.201387	2.67583	1.82263	0	0	0.341718	0.100236	15082929	1.96197	1.29418	0	0.146141	0	0	0.169838	0.543334	0.713475	0	0	0	2.17513	1.93487	0	0	10.2808	9.8112
Oncholaimus1	3.20525	0	16.7019	3.2799	1.78447	2.16184	32.2957	20.4733	0	0	2.84856	0	30970006	17.5185	5.50718	0	1.03844	0	0	0	1.86594	0	0	0	0	7.23437	10.9988	0	0	25.0414	40.5043
Oncholaimus1	4.62467	0	22.4959	4.37696	2.50238	2.91201	37.0128	22.9843	0	0	3.42084	0	26855245	21.2965	6.23733	0	1.20561	0	0	0	2.57548	1.02569	1.89724	0	0	8.90607	14.8464	0	0	33.9507	53.1385
Sphaerolaimus2	2.73055	1.37206	7.13409	3.25186	0	1.95052	20.3882	12.9024	0	0	2.97731	0.497714	26847777	34.4369	2.2374	1.39591	0.935799	0	0	3.52236	4.98178	10.1619	0	0	2.05654	9.23735	22.3762	0.0905643	3.03768	84.7888	75.3601
Oncholaimus1	4.00556	0	17.881	3.91363	1.99901	2.19427	39.1419	18.5845	0	0	3.02019	0	29469631	37.3624	19.6847	0	1.35623	0	0	0	2.54311	0	1.63422	0	0	7.10397	12.3183	0	0	30.3492	46.2605
Praeacanthonchus1	0	0	0	0.399018	0.354769	0	3.87791	3.60825	0.165488	0.643165	0.230863	0	2.3478	2.03092	0	0	0.331702	0	0	0.444921	0	0.595963	0	0	0.687751	1.1719	0.787311	0	0	4.63639	7.02153
Praeacanthonchus1	0.391836	0.390638	2.75466	1.02133	0	1.60834	9.18767	6.30746	0.688582	0.516328	1.23554	1.65476	39128397	4.62335	1.61915	0.39603	0.870332	0.225195	0	1.21806	0.391589	1.63704	0	0	2.08666	1.30346	3.51875	0.0450533	0.517753	14.4751	20.4173
Odontophora6	0.764811	0	2.37907	0.566397	0.159966	0.24294	2.48168	1.88795	0	0	0.426277	0.173896	29829268	2.67031	1.94109	0.229264	0.212234	0	0	3.09187	2.14397	1.31844	0	0	0.550587	0	4.08089	0.0234998	0.700386	9.44124	7.97207
Odontophora6	1.13943	0	3.36984	0.63849	0.176192	0.240272	2.88662	1.97329	0	0	0.505181	0.179571	37635641	3.2734	2.32432	0.275278	0.274867	0	0	0.927001	2.79049	1.68901	0	0	0.70334	0.278471	5.59996	0.038226	0.999439	12.6547	10.6486
Odontophora6	0.97215	0	3.25309	0.582865	0.174619	0.234857	3.27208	2.42562	0	0	0.481263	0.149268	40019582	3.51972	2.19231	0.240706	0.187458	0	0	0.884546	2.50878	1.62685	0	0	0.678824	0.268674	4.8794	0.03846	0.87683	11.268	9.4154
Theristus1	0.253812	0.145565	1.73707	0.371076	0	0.235861	3.05685	1.94467	0	0	0.366166	0	17973853	2.89257	1.57627	0	0.188349	0	0	0.197629	0.82879	1.00673	0	0	0	2.86921	2.50265	0	0.317601	13.3363	13.3729
Daptonema Hirsutum6	0.624093	0	2.12389	0.290226	0	0.30552	3.62786	2.04573	0	0	0.502865	0	9966517	5.25637	1.53465	0	0	0	0	0.387619	1.1699	1.50927	0	0	0.294138	1.65459	1.34615	0	3.54451	22.8309	16.8729
Daptonema Hirsutum6	0.914843	0.573455	3.32622	0.728855	0	0.549456	6.59028	2.90159	0	0	0.809257	0.509514	16124702	7.10171	2.81282	0.528841	0	0	0	0.605352	1.70207	2.14085	0	0	0.456553	2.09891	4.20903	0.03978	0.62116	30.0363	23.7629
Daptonema Hirsutum6	0.40824	0	1.42653	0.416381	0	0.286532	3.3757	2.6333	0	0	0.394755	0	7871032	3.60542	1.10862	0	0	0	0	0.236528	0.792201	1.03003	0	0	0	0.926759	2.08823	0	2.2931	9.10657	11.9145
Praeacanthonchus6	0	0	0	0.820157	0.501807	0	5.3296	2.4392	0.454636	0.708648	0.35935	0	3.78055	2.93246	0	0	0	0	0.497361	1.09876	0	0.996083	0	0	0.907758	0.748938	1.42474	0	0	7.41364	16.4366
Theristus2	0.251251	0	1.09543	0.473995	0	0.340657	4.18228	2.1328	0	0	0.319764	0.109758	10560608	3.1272	1.17954	0	0.189651	0	0	0.163162	0.366529	0.635107	0	0	0	1.74952	1.70678	0	0	8.61388	10.7283
Theristus2	0.258058	0	1.1375	0.454409	0	0.326916	4.15034	1.64804	0	0	0.308736	0.0616213	13494168	1.90632	1.21827	0	0	0	0	0	0.36268	0.617476	0	0	0	1.61873	1.71395	0	0	8.23463	9.83797
Praeacanthonchus6	0	0	0	0.460927	0.289127	0	4.02172	1.43891	0	0.363615	0.350425	0.687076	2.89227	2.43284	0	0	0	0	0	0.806507	0	0.908157	0	0	0.72742	0.916922	1.44657	0	0	6.93771	13.0882
Theristus2	0.265705	0	1.29025	0.39286	0	0.37877	4.87179	2.30546	0	0	0.392257	0.145984	12067470	2.70499	1.50854	0	0	0	0	0	0.491744	0.740513	0	0	0	2.05728	2.00997	0	0	9.27852	11.1694
Sphaerolaimus2	5.17331	2.72314	13.9222	4.05293	0	2.84765	32.4874	18.6994	0	0	5.07697	1.43827	41900657	65.8632	2.48172	2.37283	0	0	0	6.76038	10.0737	18.1352	0	0	3.81079	17.8859	44.2915	0.194684	6.56627	170.023	139.144
Daptonema Hirsutum6	0.626405	0	2.15098	0.611621	0	0.483078	5.95618	2.74788	0	0	0.716636	0.457484	13895023	5.21037	2.10183	0	0	0	0	0.43613	1.04556	1.38984	0	0	0.340812	1.70192	2.69717	0	0	20.3628	14.5271
Praeacanthonchus6	0	0	0	0.723594	0.448711	0	4.82436	2.62295	0.330317	0.519142	0.343597	0	3.10214	3.18653	0	0.355043	0	0	0	0.797488	0	0.935434	0	0	0.677338	1.15241	1.35326	0	0	6.09384	13.8704
Praeacanthonchus6	0.286207	0.285332	1.56023	1.66668	0.93763	0	11.5961	5.54631	0	0	0.820767	0.330515	34331057	5.50803	1.25998	0.716283	0.385054	0	0	1.48185	0.337633	1.73043	0	0	1.47645	1.59406	4.57797	0.0558064	0.703097	16.4838	32.0507
Enoplus2	28.1327	7.7583	59.4792	16.2085	20.1988	0	123.575	66.1177	0	0	12.7195	6.50766	97110853	96.2405	30.3291	0	9.00367	0	0	3.01644	18.5109	40.9641	17.0448	0	2.7103	10.6938	113.455	0.536486	10.0766	180.628	244.188
Enoplus2	42.6698	8.55793	89.4877	19.4634	25.0898	0	137.855	83.4056	0	0	16.4385	8.96173	131865378	127.076	36.294	0	12.0562	0	0	3.83926	27.5846	64.3069	25.5759	0	2.96097	14.4056	166.103	0.580068	14.819	271.854	310.242
Enoplus2	31.9278	7.68591	73.3936	13.6047	19.3032	0	119.214	76.9074	0	0	13.7241	7.17169	143628634	109.557	27.8728	0	8.9436	0	0	3.46276	21.368	49.2456	18.0433	0	2.98365	12.4357	122.631	0.474537	10.9242	226.753	268.286
Enoploides1	6.80919	0	9.81786	2.56081	4.6426	0	27.0172	6.22462	0	0	4.40079	0.300396	97255395	10.8341	1.82215	0	0	0	0	1.10857	4.50291	15.0789	7.05975	0	0	20.7748	40.733	0	10.1978	131.31	69.4233
Enoploides1	4.88782	1.93431	9.70842	2.43337	3.26493	0	21.0721	9.08041	0	0	3.19191	0.346224	63997431	9.89265	1.46559	0	0	0	0	0.764164	3.01643	9.88974	4.40592	0	0	13.22	21.4624	0	6.44791	74.7205	52.3929
Adoncholaimus1	2.12849	2.12198	45.9383	16.0573	13.1328	0	138.165	126.878	4.9639	4.35759	6.91169	3.00047	85005323	78.9155	30.6398	2.96093	5.67321	2.85014	0	2.09213	16.7428	20.1733	5.89705	0	3.19485	12.076	49.1719	0.168995	2.47895	98.383	217.601
Adoncholaimus1	2.41025	2.40288	59.4434	20.2656	16.669	0	160.648	149.842	6.74374	5.42633	8.43756	4.43086	76270212	94.1584	40.83	3.59249	7.70024	3.43058	0	2.21044	21.3412	21.8151	5.85783	0	4.52422	14.3168	52.6941	0.221523	2.40491	126.884	256.758
Adoncholaimus1	18.5096	2.22795	48.2131	14.3568	13.108	0	145.062	141.445	6.47535	3.19032	7.57438	3.47173	82921858	79.3294	32.5528	2.40978	6.20732	2.76861	0	2.2353	17.4812	17.4554	4.50298	0	3.83344	12.3351	49.1715	0.258003	9.39698	105.021	217.484

## Sheet: raw values of fatty acid
					ng/nem		ng/nem		ng/nem		ng/nem		ng/nem		ng/nem		ng/nem		ng/nem		ng/nem			ng/nem		ng/nem		ng/nem		ng/nem		ng/nem		ng/nem		ng/nem		ng/nem		ng/nem		ng/nem		ng/nem		ng/nem		ng/nem
	sample code	Station	number	C14:0	C14:0	C15:0	C15:0	C15:0	C15:0	C16:0	C16:0	C16:1w7	C16:1w7	C17:0	C17:0	C17:1w7	C17:1w7	C16:2w6	C16:2w6	C18:0	C18:0	C18:0	C16:3w3	C16:3w3	C18:1w9	C18:1w9	C18:1w7	C18:1w7	C18:2w6tr	C18:2w6tr	C18:2w6cis	C18:2w6cis	C20:0	C20:0	C18:3	C18:3	C20:1	C20:1	C20:1w9	C20:1w9	C20:2		C21:0	C21:0	C22:0	C22:0	20:3w6	20:3w6	20:3w3
daptonema hirsutum	43	6	50	1537261	0.611621		0	1240838	0.483078	16105786	5.95618	6538025	2.74788	1857051	0.716636	1128030	0.457484		0		13895023	5.00054		0	5320549	2.10183	13767721	5.21037		0		0	1207849	0.43613		0	2706287	1.04556	3597407	1.38984		0		0	937533	0.340812		0	1367696
	34	6	60	2198303	0.728855		0	1693604	0.549456	21384507	6.59028	8284498	2.90159	2516478	0.809257	1507587	0.509514		0		16124702	4.8358		0	8544397	2.81282	22518414	7.10171		0	1492650	0.528841	2011804	0.605352		0	5286691	1.70207	6649581	2.14085		0		0	1507108	0.456553	1507108	0.573455	2396968
	35	6	60	1255848	0.416381		0	883185	0.286532	10953672	3.3757	7518498	2.6333	1227535	0.394755		0		0		7871032	2.36052		0	3367624	1.10862	11432242	3.60542		0		0	786070	0.236528		0	2460609	0.792201	3199319	1.03003		0		0		0		0	1069625
	33	6	60	875353	0.290226		0	941713	0.30552	11771882	3.62786	5840894	2.04573	1563716	0.502865		0		0		9966517	2.98896		0	4661766	1.53465	16667124	5.25637		0		0	1288200	0.387619		0	3633759	1.1699	4687841	1.50927		0		0	970966	0.294138		0	1635177
adoncholaimus	55	1	15	12107646	16.0573	4814700	6.24813	5305238	6.88471	112081471	138.165	90563948	126.878	5373170	6.91169	2219504	3.00047	2412548	4.9639		85005323	101.972	1804696	4.35759	23268389	30.6398	62557226	78.9155	4130580	5.67321	2089302	2.96093	1738228	2.09213	1993847	2.85014	13000966	16.7428	15664780	20.1733	4143013	5.89705		0	2636597	3.19485	1394206	2.12198	11016460
	56	1	15	15280763	20.2656	6141014	7.96932	6703838	8.6997	130320178	160.648	106955423	149.842	6559391	8.43756	3277586	4.43086	3277586	6.74374		76270212	91.4937	2247314	5.42633	31006982	40.83	74640465	94.1584	5606428	7.70024	2534946	3.59249	1836525	2.21044	2399904	3.43058	16571635	21.3412	16939635	21.8151	4115454	5.85783		0	3733679	4.52422	1578765	2.40288	13852193
	57	1	15	10825407	14.3568	5055303	6.56037	5045460	6.54759	117676446	145.062	100961773	141.445	5888351	7.57438	2568104	3.47173	3147142	6.47535		82921858	99.4731	1321271	3.19032	24721140	32.5528	62885295	79.3294	4519457	6.20732	1700399	2.40978	1857182	2.2353	1936815	2.76861	13574312	17.4812	13554321	17.4554	3163600	4.50298		0	3163600	3.83344	1463832	2.22795	12124161
enoploides	52	1	30	3669650	2.43337	1573413	1.02092	3458374	2.244	34188041	21.0721	12963005	9.08041	4962811	3.19191	512216	0.346224		0		63997431	38.3857		0	2225991	1.46559	15684028	9.89265		0		0	1269798	0.764164		0	4684578	3.01643	15358967	9.88974	6190816	4.40592		0		0	2541794	1.93431	6403262
	51	1	30	3861839	2.56081	2861647	1.85681	4293370	2.7858	43833447	27.0172	8886142	6.22462	6842385	4.40079	444416	0.300396		0		97255395	58.3338		0	2767548	1.82215	17176593	10.8341		0		0	1842088	1.10857		0	6993107	4.50291	23417863	15.0789	9919744	7.05975		0		0		0	8920338
enoplus	48	2	20	19567876	19.4634	12210033	11.8839	13568274	13.2059	149106861	137.855	79378686	83.4056	17039178	16.4385	8838867	8.96173		0		131865378	118.639		0	36749679	36.294	134313200	127.076	11703898	12.0562		0	4253089	3.83926		0	28559580	27.5846	66579983	64.3069	23958014	25.5759		0	3258115	2.96097	7497095	8.55793	37266225
	47	2	20	16295499	16.2085	8836175	8.60016	11916978	11.5987	133660546	123.575	62925496	66.1177	13184215	12.7195	6418441	6.50766		0		97110853	87.3706		0	30709946	30.3291	101721251	96.2405	8740579	9.00367		0	3341571	3.01644		0	19165220	18.5109	42412068	40.9641	15966564	17.0448		0	2982282	2.7103	6796582	7.7583	24570085
	49	2	20	13677764	13.6047	9049315	8.80761	10783624	10.4956	128944249	119.214	73194245	76.9074	14225555	13.7241	7073373	7.17169		0		143628634	129.223		0	28222738	27.8728	115796087	109.557	8682268	8.9436		0	3836003	3.46276		0	22123292	21.368	50986282	49.2456	16901874	18.0433		0	3283062	2.98365	6733163	7.68591	27884528
odontophora	30	6	184	5905642	0.63849	1665455	0.176192	2271166	0.240272	28724443	2.88662	17277790	1.97329	4817482	0.505181	1629404	0.179571		0		37635641	3.68052		0	21652228	2.32432	31830274	3.2734	2454885	0.274867	2382709	0.275278	9447672	0.927001		0	26579954	2.79049	16088182	1.68901		0		0	7120077	0.70334		0	9155284
	31	6	190	5566946	0.582865	1704401	0.174619	2292368	0.234857	33621897	3.27208	21930853	2.42562	4739051	0.481263	1398605	0.149268		0		40019582	3.79007		0	21088474	2.19231	35341521	3.51972	1728818	0.187458	2151404	0.240706	9308946	0.884546		0	24675813	2.50878	16001404	1.62685		0		0	7095986	0.678824		0	8065871
	28	6	180	5124941	0.566397	1479203	0.159966	2246461	0.24294	24158110	2.48168	16171179	1.88795	3976673	0.426277	1543607	0.173896		0		29829268	2.98193		0	17689171	1.94109	25401410	2.67031	1854293	0.212234	1941291	0.229264	30826265	3.09187		0	19977792	2.14397	12285377	1.31844		0		0	5452561	0.550587		0	6011618
oncholaimus	18	1	20	3297513	3.2799	1833444	1.78447	2221163	2.16184	34931674	32.2957	19484843	20.4733	2952643	2.84856		0		0		30970006	27.8637		0	5576325	5.50718	18516192	17.5185	1008097	1.03844		0		0		0	1931895	1.86594		0		0		0		0		0	2799348
	19	1	20	4400458	4.37696	2571052	2.50238	2991922	2.91201	40033798	37.0128	21874596	22.9843	3545829	3.42084		0		0		26855245	24.1617		0	6315644	6.23733	22509330	21.2965	1170378	1.20561		0		0		0	2666511	2.57548	1061944	1.02569	1777228	1.89724		0		0		0	4039011
	22	1	20	3934639	3.91363	2053873	1.99901	2254488	2.19427	42336653	39.1419	17687216	18.5845	3130539	3.02019		0		0		29469631	26.5138		0	19931809	19.6847	39490096	37.3624	1316599	1.35623		0		0		0	2632998	2.54311		0	1530840	1.63422		0		0		0	3498305
sphaerolaimus	21	2	20	3269314	3.25186		0	2004044	1.95052	22052292	20.3882	12279489	12.9024	3086096	2.97731	490891	0.497714		0		26847777	24.1549		0	2265488	2.2374	36398035	34.4369	908455	0.935799	1313320	1.39591	3902032	3.52236		0	5157873	4.98178	10521075	10.1619		0		0	2262923	2.05654	1201976	1.37206	2384756
	42	2	20	4074690	4.05293		0	2925793	2.84765	35138934	32.4874	17796620	18.6994	5262477	5.07697	1418552	1.43827		0		41900657	37.698		0	2512884	2.48172	69614032	65.8632		0	2232430	2.37283	7489064	6.76038		0	10429721	10.0737	18776252	18.1352		0		0	4193208	3.81079	2385578	2.72314	4518171
praecanthonchus	45	6	82	6870079	1.66668		0	3949781	0.93763	51424623	11.5961	21641975	5.54631	3488100	0.820767	1336533	0.330515		0		34331057	7.53357		0	5230786	1.25998	23868980	5.50803	1532592	0.385054	2762995	0.716283	6730437	1.48185		0	1433224	0.337633	7345534	1.73043		0		0	6660905	1.47645	1024845	0.285332
	8	2	100	16186278	3.21997		0	47084177	9.16531	106153875	19.6287	78342450	16.4634	14238706	2.74736	45135585	9.15259	8916467	2.75189		57200403	10.2926	7772633	2.81515	15861138	3.13289	58135920	11.0007	3887729	0.80095	6975160	1.48277	15319185	2.76573	2682403	0.575161	4390808	0.848181	18457224	3.56542		0	5274861	1.0069	17981746	3.26836	2151701	0.491233
	26	1	100	5134090	1.02133		0	8262376	1.60834	49687805	9.18767	30014671	6.30746	6403399	1.23554	8160391	1.65476	2231091	0.688582		39128397	7.04076	1425579	0.516328	8197375	1.61915	24433202	4.62335	4224504	0.870332	1862989	0.39603	6746780	1.21806	1050251	0.225195	2027153	0.391589	8474507	1.63704		0		0	11480314	2.08666	1711075	0.390638
theristus	41	2	90	1777361	0.39286		0	1751239	0.37877	23712402	4.87179	9873687	2.30546	1829654	0.392257	647923	0.145984		0		12067470	2.41269		0	6873686	1.50854	12865644	2.70499		0		0		0		0	2291065	0.491744	3450095	0.740513		0		0		0		0	1044254
	38	2	104	2375614	0.454409		0	1746616	0.326916	23343239	4.15034	8156049	1.64804	1664084	0.308736	316038	0.0616213		0		13494168	2.33475		0	6414564	1.21827	10477395	1.90632		0		0		0		0	1952599	0.36268	3324370	0.617476		0		0		0		0	1171967
	37	2	102	2430351	0.473995		0	1785028	0.340657	23070531	4.18228	10352101	2.1328	1690385	0.319764	552093	0.109758		0		10560608	1.86302		0	6091162	1.17954	16856952	3.1272	938956	0.189651		0	921822	0.163162		0	1935372	0.366529	3353533	0.635107		0		0		0		0	1119109
	32	1	193	3600111	0.371076		0	2338520	0.235861	31906260	3.05685	17860047	1.94467	3662606	0.366166		0		0		17973853	1.67576		0	15401954	1.57627	29502913	2.89257	1764455	0.188349		0	2112684	0.197629		0	8280516	0.82879	10058367	1.00673		0		0		0	1230577	0.145565	2139116
	15	1	200	3957944	0.393681		0	2069136	0.201387	28942236	2.67583	17346358	1.82263	3542034	0.341718	988621	0.100236		0		15082929	1.35701		0	13104269	1.29418	20737033	1.96197	1418708	0.146141		0	1881448	0.169838		0	5625388	0.543334	7386939	0.713475		0		0		0	1424347	0.162589	2062421
	13	1	200	2368463	0.235582		0	1498232	0.145821	24603576	2.2747	14613644	1.5355	3238741	0.312458		0		0		13602264	1.2238		0	12378721	1.22252	20194459	1.91064	1255489	0.129328		0	1892790	0.170862		0	5991847	0.578729	7318625	0.706877		0		0		0	1213817	0.138557	1740509
metachromadora	7	2	160	10333610	1.2848		0	20939826	2.54757	102955800	11.8983	138277670	18.1616	6556720	0.790699	29097846	3.68779		0		55303448	6.21956		0	11990369	1.48021	68216946	8.06768	6775274	0.872401		0	7731247	0.872375		0	4288340	0.517742	17174119	2.07347		0	5498968	0.656048	5118685	0.581483	2656449	0.379042
[truncated: 15 more columns]

## Sheet: isotope data
																				delta15N		delta13C
											mean delta15N	mean delta13C				Enoploides	85	B1	plaat1	16.4		-13.8
				15 June 2010					Enoploides		15.8429	-13.6286				Enoploides	85	A1	plaat1	16.2		-13.4
									Metachromadora		14.2833	-13.9833				Enoploides	75	A4	plaat3	15.4		-12.9
									Enoplus		18.8333	-13.5				Enoploides	80	A1	station2Ia	15.6		-13.9
									Praeacanthonchus		14.4	-12.65				Enoploides	80	A2	station2Ia	15.8		-13.9
									Adoncholaimus		16.7143	-14.7857				Enoploides	75	B1	station2IIb	15.6		-13.8
									Daptonema		15.15	-14.3				Enoploides	75	C1	station2IIb	15.9		-13.7
									Odontophora		18.22	-14.6	0.39598	1.13137		Metachromadora	150	A3	station2Ia	14		-14
									Oncholaimus		17.4	-16.9				Metachromadora	150	A4	station2Ia	14.2		-14
									Theristus		13.97	-13.99				Metachromadora	120	B3	station2IIb	13.8		-14.1
																Metachromadora	120	B4	station2IIb	13.7		-13.8
																Metachromadora	130	B3	plaat1	14.7		-14.1
																Metachromadora	130	A3	plaat1	15.3		-13.9
																Enoplus	2	A4	plaat1	19		-13.5
																Enoplus	2	A3	station2IIb	18.1		-13.3
																Enoplus		B1		19.4		-13.7
																Praeacanthonchus	77	A2	plaat1	14.8		-12.8
																Praeacanthonchus	77	B2	plaat1	15.5		-12.5
																Praeacanthonchus	83	B2	station2IIb	13.5		-12.6
																Praeacanthonchus	50	C1	station2Ia	13.8		-12.7
																Adoncholaimus	51	B4	plaat1	15.5		-14
																Adoncholaimus	35	C3	plaat1	17		-14.8
																Adoncholaimus	35	C4	plaat1	16.9		-14.6
																Adoncholaimus	45	C2	station2IIb	16.8		-15
																Adoncholaimus	35	C3	station2IIb	17.1		-15.7
																Adoncholaimus	40	C3	station2Ia	16.9		-14.7
											d15N	d13C	stdevN	stdevC		Adoncholaimus	40	C4	station2Ia	16.8		-14.7
									MPB		9.7	-14.5
											9.4	-14.7
											9.1	-15.3
											9.3	-13.8
										mean	9.375	-14.575
																Daptonema	45	A1	station2IIb	15.1	316	-14.1	4022
																Daptonema small	140/170	C2	plaat2	15		-14.1
																Daptonema	166	B2	station2Ia	15.3		-14.5
																Odontophora	200	A3	plaat2	18.5		-15.4
																Odontophora		A1		17.94		-13.8
																Oncholaimus		E6		17.4		-16.9
																Theristus				13.97		-13.99
